# Supplementary material for: Visual Analytic Tools and Techniques in Population Health and Health Services Research: Protocol for a Scoping Review
Source: PubMed Central journal article supplement (PMC6913692; doi:10.2196/14019), 2019-10-28
Supplement: resprot_v8i10e14019_app1.pdf [file resprot_v8i10e14019_app1.pdf]

## Annex 1: Medline Search Strategy

Ovid MEDLINE(R) Epub Ahead of Print, In-Process & Other Non-Indexed Citations, Ovid MEDLINE(R) Daily and Ovid MEDLINE(R) <1946 to February 26, 2019>

| #  | Searches                                                                                            | Results |
|----|-----------------------------------------------------------------------------------------------------|---------|
| 1  | "visual* analytic*".tw,kf.                                                                          | 498     |
| 2  | ((health or healthcare) adj (analytic* or analy*)).ti,kf.                                           | 157     |
| 3  | data visualization/                                                                                 | 5       |
| 4  | (visual* adj analy*).tw,kf.                                                                         | 4448    |
| 5  | (information adj visual*).tw,kf.                                                                    | 446     |
| 6  | (data adj visual*).tw,kf.                                                                           | 1616    |
| 7  | (visual* adj platform?).tw,kf.                                                                      | 118     |
| 8  | (visual* adj dashboard?).tw,kf.                                                                     | 20      |
| 9  | (visual* adj representation?).tw,kf.                                                                | 1711    |
| 10 | (interactiv* adj3 (map* or graph*)).tw,kf.                                                          | 1041    |
| 11 | (visual* and (analy* or information* or data or platform? or dashboard? or representation?)).ti,kf. | 11707   |
| 12 | or/3-11                                                                                             | 18488   |
| 13 | Big data/                                                                                           | 125     |
| 14 | big data.tw,kf.                                                                                     | 4900    |
| 15 | ((health or healthcare) adj3 data).tw,kf.                                                           | 32400   |
| 16 | exp Health services research/                                                                       | 156248  |

|    |                                                                                                  |         |
|----|--------------------------------------------------------------------------------------------------|---------|
| 17 | ((health or healthcare) adj3 (research* or data or service? or deliver*)).tw,kf.                 | 234548  |
| 18 | exp Health Services Accessibility/                                                               | 103235  |
| 19 | Health Planning/                                                                                 | 21374   |
| 20 | exp Regional Health Planning/                                                                    | 38865   |
| 21 | Health Resources/                                                                                | 11994   |
| 22 | Healthcare Disparities/                                                                          | 13936   |
| 23 | ((health or healthcare) adj3 (equit* or equalit* or inequit* or inequalit* or disparit*)).tw,kf. | 28701   |
| 24 | ((health or healthcare) adj3 (plan? or planning?)).tw,kf.                                        | 28398   |
| 25 | ((health or healthcare) adj3 evaluat*).tw,kf.                                                    | 28202   |
| 26 | ((health or healthcare) adj3 (utiliz* or utilis* or access* or resourc*)).tw,kf.                 | 68797   |
| 27 | ((health or healthcare) adj3 monitor*).tw,kf.                                                    | 9584    |
| 28 | Population Health/                                                                               | 374     |
| 29 | exp Population Characteristics/                                                                  | 1823783 |
| 30 | (population* adj3 health*).tw,kf.                                                                | 40191   |
| 31 | (population* adj3 (characteristic? or demographic?)).tw,kf.                                      | 29135   |
| 32 | exp Population Surveillance/                                                                     | 64189   |
| 33 | Public Health Systems Research/                                                                  | 18      |
| 34 | surveillance.tw,kf.                                                                              | 159662  |
| 35 | biosurveillance.tw,kf.                                                                           | 260     |
| 36 | exp Public Health/                                                                               | 7247194 |
| 37 | (public* adj3 health*).tw,kf.                                                                    | 249554  |
| 38 | epidemiolog*.tw,kf.                                                                              | 381559  |

|    |                                                 |         |
|----|-------------------------------------------------|---------|
| 39 | (administrative adj2 (data or database)).tw,kf. | 11164   |
| 40 | or/13-39                                        | 8019705 |
| 41 | 12 and 40                                       | 5689    |
| 42 | 1 or 2 or 41                                    | 6185    |
| 43 | limit 42 to yr="2005 -Current"                  | 4719    |
| 44 | limit 43 to English language                    | 4563    |

\*All 12 seminal citations that are available in Medline are retrieved by the current search strategy.
